# Supplementary material for: Trehalose Suppresses Lysosomal Anomalies in Supporting Cells of Oocytes and Maintains Female Fertility
Source: MDPI journal article supplement (doi:10.3390/nu14102156), 2022-05-22
Supplement: s1 [file s1]

## Supplementary Table S1

|                                  |                     |
|----------------------------------|---------------------|
| Number of patients               | 15                  |
| Age (years)                      | 37.5 $\pm$ 1.0      |
| Day 3 FSH (mIU/mL)               | 9.7 $\pm$ 0.9       |
| Day 3 LH (mIU/mL)                | 3.7 $\pm$ 1.1       |
| Day 3 estradiol (pg/mL)          | 60.1 $\pm$ 17.7     |
| Day of hCG estradiol (pg/mL)     | 2,932.9 $\pm$ 387.3 |
| Day of hCG progesterone (ng/mL)  | 1.1 $\pm$ 0.1       |
| Day of hCG FSH (mIU/mL)          | 16.4 $\pm$ 1.0      |
| Day of hCG LH (mIU/mL)           | 2.9 $\pm$ 0.8       |
| Ampoules of gonadotropin used*   | 23.3 $\pm$ 2.0      |
| Days of stimulation              | 13.9 $\pm$ 0.4      |
| Number of follicles aspirated    | 17.1 $\pm$ 2.3      |
| Number of oocytes retrieved      | 11.3 $\pm$ 1.5      |
| Number of mature COCs**          | 4.5 $\pm$ 1.4       |
| Number of immature COCs          | 4.3 $\pm$ 0.6       |
| Number of dysmature COCs         | 2.4 $\pm$ 0.4       |
| Percentage of embryos fertilized | 65.5 $\pm$ 4.5      |
| *1 ampoule = 75IU                |                     |
| **COCs: Cumulus-oocyte complex   |                     |

**Supplementary Table S1.** Clinical demographic data of patients.  
Values are expressed as mean  $\pm$  SE.
